# Supplementary material
Source: PubMed Central journal article supplement (PMC8653546)
Supplement: NIHMS1749380-supplement-1.pdf [file NIHMS1749380-supplement-1.pdf]

Supplementary Table 1

| Factor <sup>1</sup>              | Level              | N (level) | N (factor) | NLR median [IQR] | p-val <sup>2</sup> |
|----------------------------------|--------------------|-----------|------------|------------------|--------------------|
| <b>Depression</b>                | Yes                | 141       | 2,107      | 2.02 [1.38]      | 0.67               |
|                                  | No                 | 1,966     |            | 2.06 [1.31]      |                    |
| <b>GAD</b>                       | Yes                | 50        | 2,111      | 2.09 [1.66]      | 0.63               |
|                                  | No                 | 2,061     |            | 2.06 [1.31]      |                    |
| <b>Panic</b>                     | Yes                | 47        | 2,112      | 1.95 [1.45]      | 0.73               |
|                                  | No                 | 2,065     |            | 2.06 [1.31]      |                    |
| <b>Arthritis</b>                 | Yes                | 11739     | 44,596     | 2.08 [1.28]      | <2.2E-16           |
|                                  | No                 | 32775     |            | 1.95 [1.14]      |                    |
|                                  | Refused/Don't know | 82        |            | 2.16 [1.01]      |                    |
| <b>Heart condition</b>           | Yes                | 4,925     | 44,597     | 2.27 [1.46]      | <2.2E-16           |
|                                  | No                 | 39,611    |            | 1.95 [1.15]      |                    |
|                                  | Refused/Don't know | 61        |            | 2.02 [0.95]      |                    |
| <b>Emphysema</b>                 | Yes                | 910       | 44,597     | 2.46 [1.71]      | <2.2E-16           |
|                                  | No                 | 43,630    |            | 1.98 [1.17]      |                    |
|                                  | Refused/Don't know | 57        |            | 2.69 [1.38]      |                    |
| <b>Cancer</b>                    | Yes                | 3,997     | 44,597     | 2.24 [1.42]      | <2.2E-16           |
|                                  | No                 | 40,553    |            | 1.96 [1.16]      |                    |
|                                  | Refused/Don't know | 47        |            | 1.99 [0.98]      |                    |
| <b>Diabetes</b>                  | Yes                | 5,252     | 48,020     | 2.10 [1.29]      | <2.2E-16           |
|                                  | No                 | 41,876    |            | 1.96 [1.16]      |                    |
|                                  | Borderline         | 862       |            | 1.96 [1.17]      |                    |
|                                  | Refused/Don't know | 30        |            | 2.22 [1.29]      |                    |
| <b>Hypertension</b>              | Yes                | 15,457    | 47,862     | 2.06 [1.27]      | <2.2E-16           |
|                                  | No                 | 32,330    |            | 1.94 [1.13]      |                    |
|                                  | Refused/Don't know | 75        |            | 2.07 [1.21]      |                    |
| <b>Aspirin use (recommended)</b> | Yes                | 1,789     | 6,198      | 2.13 [1.41]      | 1.71E-09           |
|                                  | No                 | 4,401     |            | 1.98 [1.14]      |                    |
|                                  | Refused/Don't know | 8         |            | 2.36 [1.54]      |                    |
| <b>Aspirin use (independent)</b> | Yes                | 235       | 4,409      | 2.03 [1.20]      | 0.83               |
|                                  | No                 | 4,168     |            | 1.98 [1.14]      |                    |

|                                                                                                                                                                                                                                                                                                                                                          |                     |       |             |             |        |
|----------------------------------------------------------------------------------------------------------------------------------------------------------------------------------------------------------------------------------------------------------------------------------------------------------------------------------------------------------|---------------------|-------|-------------|-------------|--------|
|                                                                                                                                                                                                                                                                                                                                                          | Refused/Don't know  | 6     |             | 2.01 [0.69] |        |
| <b>Aspirin frequency</b>                                                                                                                                                                                                                                                                                                                                 | One every day       | 1,807 |             | 2.13 [1.40] |        |
|                                                                                                                                                                                                                                                                                                                                                          | One every other day | 134   | 2,132       | 1.89 [1.19] | 0.0009 |
|                                                                                                                                                                                                                                                                                                                                                          | Another schedule    | 187   |             | 1.96 [1.09] |        |
|                                                                                                                                                                                                                                                                                                                                                          | Refused/Don't know  | 4     | 2.86 [1.40] |             |        |
| <p><sup>1</sup> Detailed descriptions of all factors can be found in Table 1</p> <p><sup>2</sup> p values for difference in median NLR between factor levels: calculated using Mann Whitney test for 2 levels and Kruskal Wallis omnibus test for &gt;2 levels. P-trend obtained from Jonckheere-Terpstra test for ordered differences among levels.</p> |                     |       |             |             |        |

Journal Pre-proof

| Supplementary Table 3                  |                               | Arthritis (n=5,470)    |             |          | Heart Condition (n=2,165) |             |          | Cancer (n=1,970)       |             |          | Diabetes (n=2,491)     |             |          | Hypertension (n=7,248) |             |          |
|----------------------------------------|-------------------------------|------------------------|-------------|----------|---------------------------|-------------|----------|------------------------|-------------|----------|------------------------|-------------|----------|------------------------|-------------|----------|
| Factor                                 | Level                         | N (level) <sup>1</sup> | Coefficient | p-val    | N (level) <sup>1</sup>    | Coefficient | p-val    | N (level) <sup>1</sup> | Coefficient | p-val    | N (level) <sup>1</sup> | Coefficient | p-val    | N (level) <sup>1</sup> | Coefficient | p-val    |
| Sex                                    | Male                          | 2,460                  | Ref         |          | 1,344                     | Ref         |          | 999                    | Ref         |          | 1,425                  | Ref         |          | 3,429                  | Ref         |          |
|                                        | Female                        | 3,010                  | -0.34       | <2E-16   | 821                       | -0.33       | 1,806.04 | 771                    | -0.47       | 1,056.09 | 1,066                  | -0.23       | Ref      | 2,068                  | -0.26       | 1,831.12 |
| Age                                    | <60                           | 2,311                  | Ref         |          | 567                       | Ref         |          | 571                    | Ref         |          | 979                    | Ref         |          | 3,268                  | Ref         |          |
|                                        | 60-69                         | 1,277                  | 0.11        | 0.02     | 1,209                     | 0.25        | 0.02     | 1,199                  | 0.10        | 0.28     | 1,553                  | 0.19        | Ref      | 1,400                  | 0.14        | 0.001    |
|                                        | 70-79                         | 1,056                  | Ref         |          | 1,209                     | Ref         |          | 932                    | Ref         |          | 1,403                  | Ref         |          | 1,313                  | Ref         |          |
|                                        | 80-89                         | 1,448                  | -0.63       | <2E-16   | 466                       | -0.63       | 1,896.09 | 262                    | -0.58       | 1,406.07 | 472                    | -0.69       | <2E-16   | 833                    | -0.60       | <2E-16   |
|                                        | 90                            | 1,641                  | -0.11       | 0.11     | 911                       | -0.08       | 0.04     | 104                    | -0.26       | 0.12     | 429                    | -0.27       | 0.005    | 472                    | -0.13       | 0.04     |
|                                        | Continuous                    | 1,711                  | -0.12       | 0.09     | 185                       | -0.18       | 0.21     | 123                    | -0.26       | 0.09     | 273                    | -0.21       | 0.05     | 1,473                  | -0.19       | 0.003    |
|                                        | Other Hispanic                | 262                    | 0.08        | 0.77     | 114                       | -0.05       | 0.77     | 78                     | -0.22       | 0.02     | 185                    | -0.38       | 0.002    | 477                    | -0.21       | 0.004    |
| Education Level                        | Less than 12th grade          | 1,426                  | Ref         |          | 681                       | Ref         |          | 360                    | Ref         |          | 822                    | Ref         |          | 1,870                  | Ref         |          |
|                                        | High school/GED or equivalent | 2,984                  | 0.10        | 0.04     | 1,150                     | 0.15        | 0.10     | 1,057                  | 0.10        | 0.32     | 1,264                  | 0.13        | 0.027    | 3,082                  | 0.12        | 0.004    |
|                                        | College graduate or above     | 1,056                  | 0.15        | 0.03     | 312                       | 0.44        | 0.001    | 401                    | 0.30        | 0.02     | 401                    | 0.31        | 0.005    | 1,408                  | 0.18        | 0.002    |
| Marital Status                         | Married                       | 2,934                  | Ref         |          | 1,322                     | Ref         |          | 1,156                  | Ref         |          | 1,392                  | Ref         |          | 3,885                  | Ref         |          |
|                                        | Widowed                       | 773                    | 2,406.01    | 5,006.04 | 381                       | 5,381.01    | 8,276.05 | 307                    | 0.18        | 0.19     | 314                    | 0.05        | 0.68     | 956                    | 0.19        | 0.003    |
|                                        | Divorced                      | 869                    | 0.07        | 0.27     | 324                       | 0.05        | 0.69     | 266                    | 0.06        | 0.64     | 364                    | -0.07       | 0.47     | 1,058                  | -0.01       | 0.81     |
|                                        | Separated                     | 189                    | 0.1         | 0.56     | 76                        | 0.29        | 0.18     | 57                     | 0.35        | 0.12     | 92                     | 0.65        | 0.77     | 274                    | 0.20        | 0.04     |
|                                        | Never married                 | 467                    | 0.05        | 0.52     | 169                       | 0.02        | 0.92     | 124                    | 0.05        | 0.76     | 225                    | -0.14       | 0.31     | 736                    | 0.05        | 0.40     |
|                                        | Living with partner           | 255                    | 0.03        | 0.73     | 93                        | -0.06       | 0.76     | 60                     | 0.09        | 0.65     | 102                    | -0.13       | 0.42     | 406                    | -0.01       | 0.89     |
| People in Household                    | 1                             | 1,168                  | Ref         |          | 503                       | Ref         |          | 464                    | Ref         |          | 473                    | Ref         |          | 1,444                  | Ref         |          |
|                                        | 2                             | 2,332                  | -0.07       | 0.25     | 926                       | 0.08        | 0.53     | 956                    | -0.0006     | 0.99     | 917                    | 0.01        | 0.45     | 927                    | -0.01       | 0.83     |
|                                        | 3                             | 784                    | -0.05       | 0.47     | 289                       | 0.09        | 0.54     | 240                    | -0.06       | 0.68     | 408                    | -0.12       | 0.33     | 1,235                  | -0.06       | 0.34     |
|                                        | 4                             | 693                    | -0.07       | 0.36     | 208                       | -0.14       | 0.39     | 143                    | -0.10       | 0.56     | 313                    | -0.12       | 0.31     | 809                    | 0.03        | 0.73     |
|                                        | 5                             | 356                    | -0.12       | 0.18     | 115                       | -0.10       | 0.62     | 87                     | -0.11       | 0.60     | 176                    | -0.09       | 0.55     | 526                    | -0.01       | 0.89     |
|                                        | 6                             | 174                    | -0.01       | 0.92     | 64                        | 0.04        | 0.80     | 48                     | 0.09        | 0.73     | 101                    | 0.12        | 0.50     | 269                    | -0.12       | 0.36     |
|                                        | 7+                            | 154                    | -0.17       | 0.19     | 60                        | -0.06       | 0.80     | 32                     | 0.38        | 0.24     | 103                    | -0.12       | 0.28     | 208                    | -0.11       | 0.29     |
| Income                                 | < \$20,000                    | 1,455                  | Ref         |          | 694                       | Ref         |          | 394                    | Ref         |          | 666                    | Ref         |          | 1,781                  | Ref         |          |
|                                        | \$20,000 to \$44,999          | 1,571                  | 0.007       | 0.90     | 679                       | 0.03        | 0.77     | 384                    | -0.05       | 0.64     | 775                    | -0.11       | 0.20     | 2,138                  | 0.05        | 0.26     |
|                                        | \$45,000 to \$74,999          | 959                    | 0.007       | 0.91     | 358                       | 0.02        | 0.86     | 369                    | -0.12       | 0.32     | 450                    | -0.09       | 0.36     | 1,505                  | -0.07       | 0.22     |
|                                        | \$75,000 to \$74,999          | 1,127                  | -0.04       | 0.60     | 299                       | -0.13       | 0.36     | 504                    | -0.17       | 0.18     | 422                    | -0.23       | 0.04     | 1,570                  | -0.07       | 0.35     |
| Health Insurance                       | Yes                           | 4,870                  | Ref         |          | 1,950                     | Ref         |          | 1,841                  | Ref         |          | 2,146                  | Ref         |          | 6,259                  | Ref         |          |
|                                        | No                            | 593                    | -0.04       | 0.49     | 210                       | -0.05       | 0.71     | 127                    | -0.02       | 0.92     | 344                    | -0.004      | 0.97     | 1,022                  | -0.05       | 0.37     |
| Ever Smoker                            | Yes                           | 3,324                  | Ref         |          | 1,469                     | Ref         |          | 1,194                  | Ref         |          | 1,431                  | Ref         |          | 4,129                  | Ref         |          |
|                                        | No                            | 2,145                  | -0.07       | 0.09     | 696                       | -0.16       | 0.06     | 784                    | -0.05       | 0.50     | 1,059                  | -0.11       | 0.10     | 3,312                  | -0.05       | 0.16     |
| Alcohol use 1 (drinking days per year) | None                          | 1,689                  | Ref         |          | 867                       | Ref         |          | 565                    | Ref         |          | 971                    | Ref         |          | 2,136                  | Ref         |          |
|                                        | < 10                          | 1,291                  | -0.11       | 0.06     | 459                       | -0.19       | 0.07     | 407                    | -0.05       | 0.60     | 635                    | -0.05       | 0.55     | 1,628                  | -0.10       | 0.04     |
|                                        | > 10 and < 50                 | 854                    | -0.01       | 0.85     | 280                       | 0.04        | 0.77     | 316                    | -0.18       | 0.10     | 373                    | 0.05        | 0.63     | 1,221                  | -0.07       | 0.21     |
|                                        | > 50 and < 100                | 491                    | -0.05       | 0.48     | 150                       | -0.12       | 0.45     | 164                    | -0.10       | 0.48     | 186                    | -0.13       | 0.31     | 609                    | -0.11       | 0.11     |
|                                        | > 100                         | 1,191                  | -0.06       | 0.26     | 404                       | -0.21       | 0.05     | 516                    | -0.13       | 0.21     | 321                    | -0.05       | 0.83     | 1,658                  | -0.06       | 0.20     |
| Age                                    | < 18.5                        | 54                     | Ref         |          | 32                        | Ref         |          | 29                     | Ref         |          | 29                     | Ref         |          | 18                     | Ref         |          |
|                                        | > 18.5 and < 25               | 1,095                  | 0.00001     | 0.99     | 430                       | -0.01       | 0.97     | 517                    | -0.05       | 0.64     | 300                    | -0.64       | 0.19     | 1,234                  | -0.19       | 0.33     |
|                                        | > 25 and < 30                 | 1,475                  | -0.16       | 0.99     | 602                       | -0.34       | 0.30     | 680                    | -0.20       | 0.10     | 698                    | -0.74       | 0.12     | 2,305                  | -0.33       | 0.08     |
|                                        | > 30                          | 2,635                  | -0.16       | 0.35     | 1,031                     | -0.34       | 0.30     | 764                    | -0.28       | 0.48     | 1,483                  | -0.78       | 0.10     | 3,671                  | -0.35       | 0.07     |
| Physical Activity                      | None                          | 1,338                  | Ref         |          | 1,448                     | Ref         |          | 1,072                  | Ref         |          | 1,633                  | Ref         |          | 4,288                  | Ref         |          |
|                                        | Moderate only                 | 1,538                  | -0.16       | 0.0004   | 565                       | -0.08       | 0.39     | 658                    | -0.17       | 0.03     | 686                    | -0.18       | 0.81     | 2,043                  | -0.14       | 0.0006   |
|                                        | Vigorous only                 | 165                    | -0.15       | 0.18     | 35                        | -0.23       | 0.45     | 75                     | -0.44       | 0.07     | 64                     | -0.04       | 0.83     | 293                    | -0.20       | 0.03     |
|                                        | Moderate and vigorous         | 446                    | -0.16       | 0.03     | 165                       | -0.22       | 0.22     | 165                    | -0.31       | 0.02     | 125                    | -0.11       | 0.43     | 682                    | -0.20       | 0.003    |
| Time sitting/reclining                 | < 1 hour                      | 662                    | Ref         |          | 318                       | Ref         |          | 183                    | Ref         |          | 188                    | Ref         |          | 884                    | Ref         |          |
|                                        | > 1 hour and < 2 hours        | 1,245                  | 0.05        | 0.45     | 997                       | 0.11        | 0.42     | 967                    | 0.11        | 0.39     | 1,110                  | -0.02       | 0.87     | 3,440                  | 0.07        | 0.22     |
|                                        | > 2 hours and < 4 hours       | 3,980                  | 0.16        | 0.01     | 852                       | 0.21        | 0.13     | 791                    | 0.19        | 0.15     | 931                    | 0.26        | 0.01     | 2,708                  | 0.16        | 0.005    |
|                                        | > 4 hours                     | 1,911                  | -0.001      | 0.99     | 89                        | 0.09        | 0.71     | 62                     | -0.00004    | 0.99     | 101                    | 0.09        | 0.61     | 240                    | 0.13        | 0.23     |
| Arthritis                              | Yes                           | 1,168                  | Ref         |          | 1,168                     | Ref         |          | 1,168                  | Ref         |          | 1,168                  | Ref         |          | 1,168                  | Ref         |          |
|                                        | No                            | 1,088                  | Ref         |          | 970                       | -0.08       | 0.32     | 950                    | -0.06       | 0.40     | 1,332                  | 0.04        | 0.58     | 4,012                  | -0.01       | 0.69     |
| Heart condition                        | Yes                           | 1,168                  | Ref         |          | 1,168                     | Ref         |          | 1,168                  | Ref         |          | 1,168                  | Ref         |          | 1,168                  | Ref         |          |
|                                        | No                            | 4,272                  | -0.22       | Ref      | 1,947                     | -0.05       | 0.55     | 1,804                  | -0.16       | 0.02     | 2,568                  | -0.23       | 1,546.07 | 5,658                  | -0.23       | 1,546.07 |
| Emplyema                               | Yes                           | 294                    | Ref         |          | 194                       | Ref         |          | 118                    | Ref         |          | 119                    | Ref         |          | 250                    | Ref         |          |
|                                        | No                            | 5,166                  | -0.27       | 0.002    | 1,967                     | -0.25       | 0.08     | 1,856                  | -0.56       | 0.00037  | 2,365                  | -0.12       | 0.40     | 6,960                  | -0.36       | 5,716.00 |
| Cancer                                 | Yes                           | 1,056                  | Ref         |          | 472                       | Ref         |          | 472                    | Ref         |          | 461                    | Ref         |          | 1,599                  | Ref         |          |
|                                        | No                            | 4,414                  | -0.14       | 0.004    | 681                       | 0.06        | 0.90     | 367                    | Ref         |          | 367                    | Ref         |          | 1,135                  | Ref         | 0.0006   |
| Diabetes                               | Yes                           | 1,155                  | Ref         |          | 681                       | Ref         |          | 367                    | Ref         |          | 2,120                  | -0.21       | 0.02     | 1,599                  | -0.17       | 0.0006   |
|                                        | No                            | 4,303                  | -0.12       | 0.03     | 1,398                     | -0.14       | 0.12     | 1,330                  | -0.25       | 0.01     | 1,315                  | -0.26       | 0.01     | 5,231                  | -0.15       | 0.0002   |
|                                        | Borderline                    | 208                    | -0.23       | 0.03     | 89                        | -0.04       | 0.85     | 72                     | -0.53       | 0.009    | 72                     | -0.53       | 0.009    | 291                    | -0.10       | 0.29     |
| Hypertension                           | Yes                           | 1,327                  | Ref         |          | 668                       | Ref         |          | 632                    | Ref         |          | 749                    | Ref         |          | 2,491                  | Ref         |          |
|                                        | No                            | 5,921                  | -0.08       | 0.05     | 2,497                     | -0.23       | 0.01     | 2,338                  | -0.19       | 0.02     | 2,742                  | -0.07       | 0.29     | 4,757                  | -0.08       | 0.004    |

<sup>1</sup> Participant counts in multivariable model reflect only participants with complete data for all included variables. Note that participants reporting "refused/don't know" are excluded from this table for brevity, and thus slight variations from these participant totals may be observed.

| Supplementary Table 4 |                               | Univariate             |             |          | Multivariable          |             |          |
|-----------------------|-------------------------------|------------------------|-------------|----------|------------------------|-------------|----------|
| Factor                | Level                         | N (level) <sup>1</sup> | Coefficient | p-val    | N (level) <sup>1</sup> | Coefficient | p-val    |
| Sex                   | Male                          | 2,206                  | Ref         |          | 30,704                 | Ref         |          |
|                       | Female                        | 9,533                  | -0.03       | 0.008    | 9,533                  | -0.13       | 5,591.12 |
| Age                   | <60                           | 13,039                 | Ref         |          | 13,685                 | Ref         |          |
|                       | 60-69                         | 14,964                 | 0.28        | <2E-16   | 14,964                 | 0.28        | <2E-16   |
|                       | 70-79                         | 48,023                 | 0.0066      | <2E-16   | 20,237                 | 0.004       | 5,596.07 |
|                       | Continuous                    | 13,039                 | Ref         |          | 13,685                 | Ref         |          |
| Race                  | Non-Hispanic White            | 31,254                 | Ref         |          | 9,251                  | Ref         |          |
|                       | Non-Hispanic Black            | 9,928                  | -0.59       | <2E-16   | 4,066                  | -0.53       | <2E-16   |
|                       | Hispanic American             | 9,138                  | -0.20       | <2E-16   | 3,019                  | -0.10       | 5,436.04 |
|                       | Other Hispanic                | 1,468                  | -0.28       | <2E-16   | 2,089                  | -0.15       | 3,306.07 |
|                       | Other Race                    | 1,856                  | -0.31       | <2E-16   | 1,832                  | -0.21       | 3,345.11 |
| Education Level       | Less than 12th grade          | 12,550                 | Ref         |          | 4,674                  | Ref         |          |
|                       | High school/GED or equivalent | 23,657                 | 0.009       | 0.51     | 10,707                 | 0.058       | 0.01     |
|                       | College graduate or above     | 9,452                  | -0.003      | 0.84     | 4,943                  | 0.076       | 0.01     |
| Marital Status        | Married                       | 52,641                 | Ref         |          | 30,419                 | Ref         |          |
|                       | Widowed                       | 1,856                  | 0.27        | <2E-16   | 1,391                  | 0.19        | 1,256.06 |
|                       | Divorced                      | 4,465                  | -0.005      | 0.8      | 2,355                  | 0.03        | 0.31     |
|                       | Separated                     | 1,468                  | -0.04       | 0.23     | 683                    | 0.12        | 0.02     |
|                       | Never married                 | 9,432                  | -0.10       | 3,646.11 | 3,691                  | 0.09        | 0.002    |
|                       | Living with partner           | 3,323                  | -0.12       | 1,656.03 | 1,660                  |             |          |

NHANES participants  
between 1999 and 2016  
(n=75,218)

Exclusion of all  
participants aged 17  
or under  
(n=27,195)

Study population  
(n=48,023)

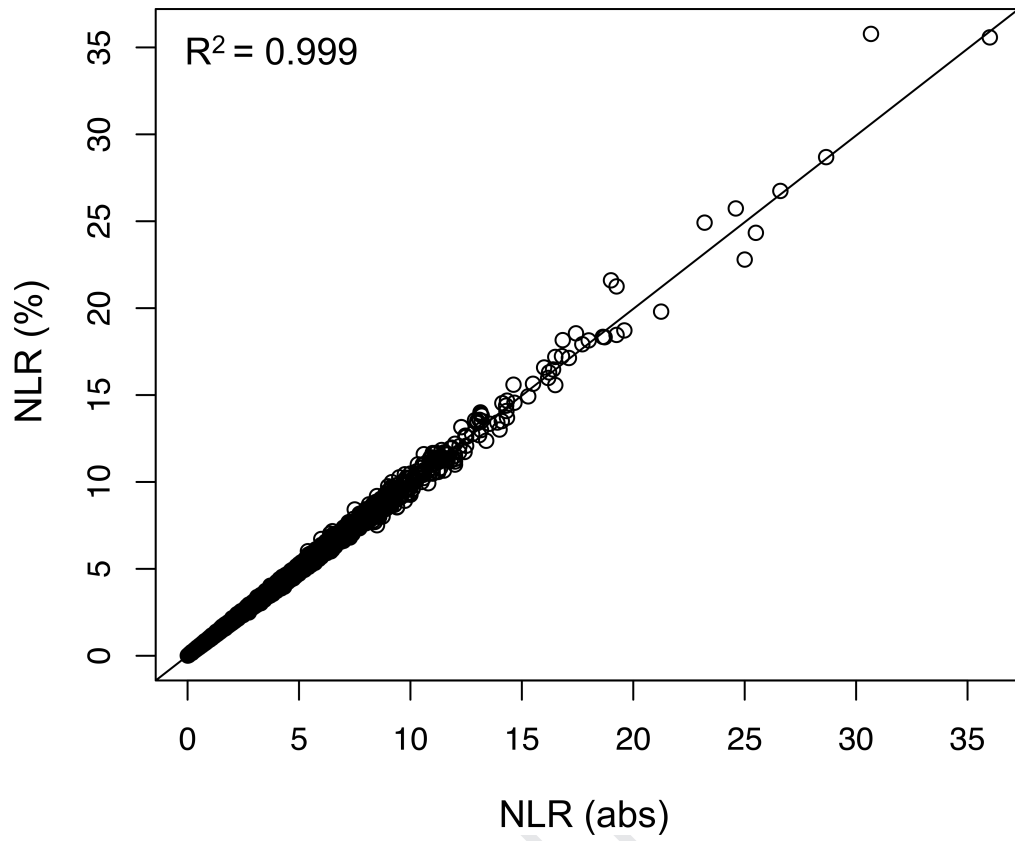

Journal

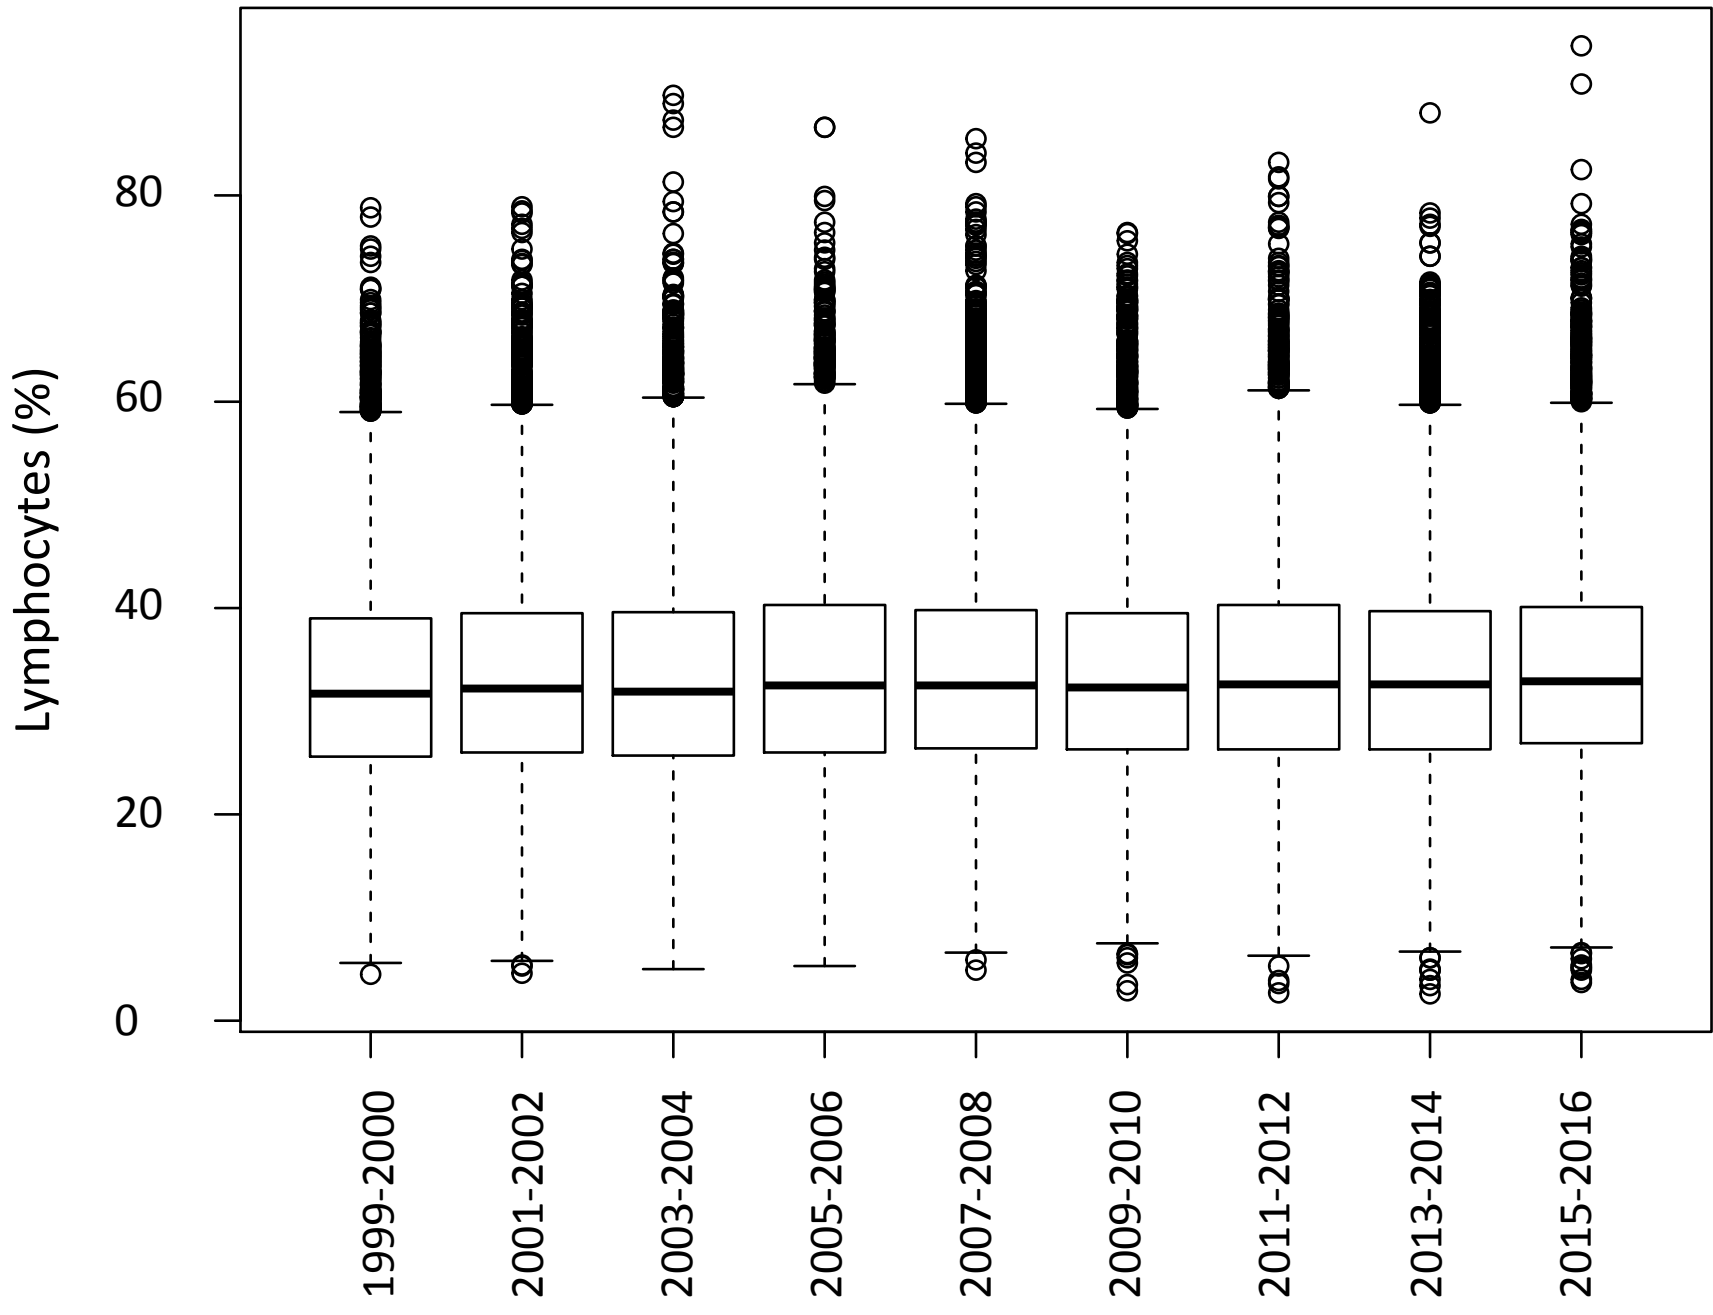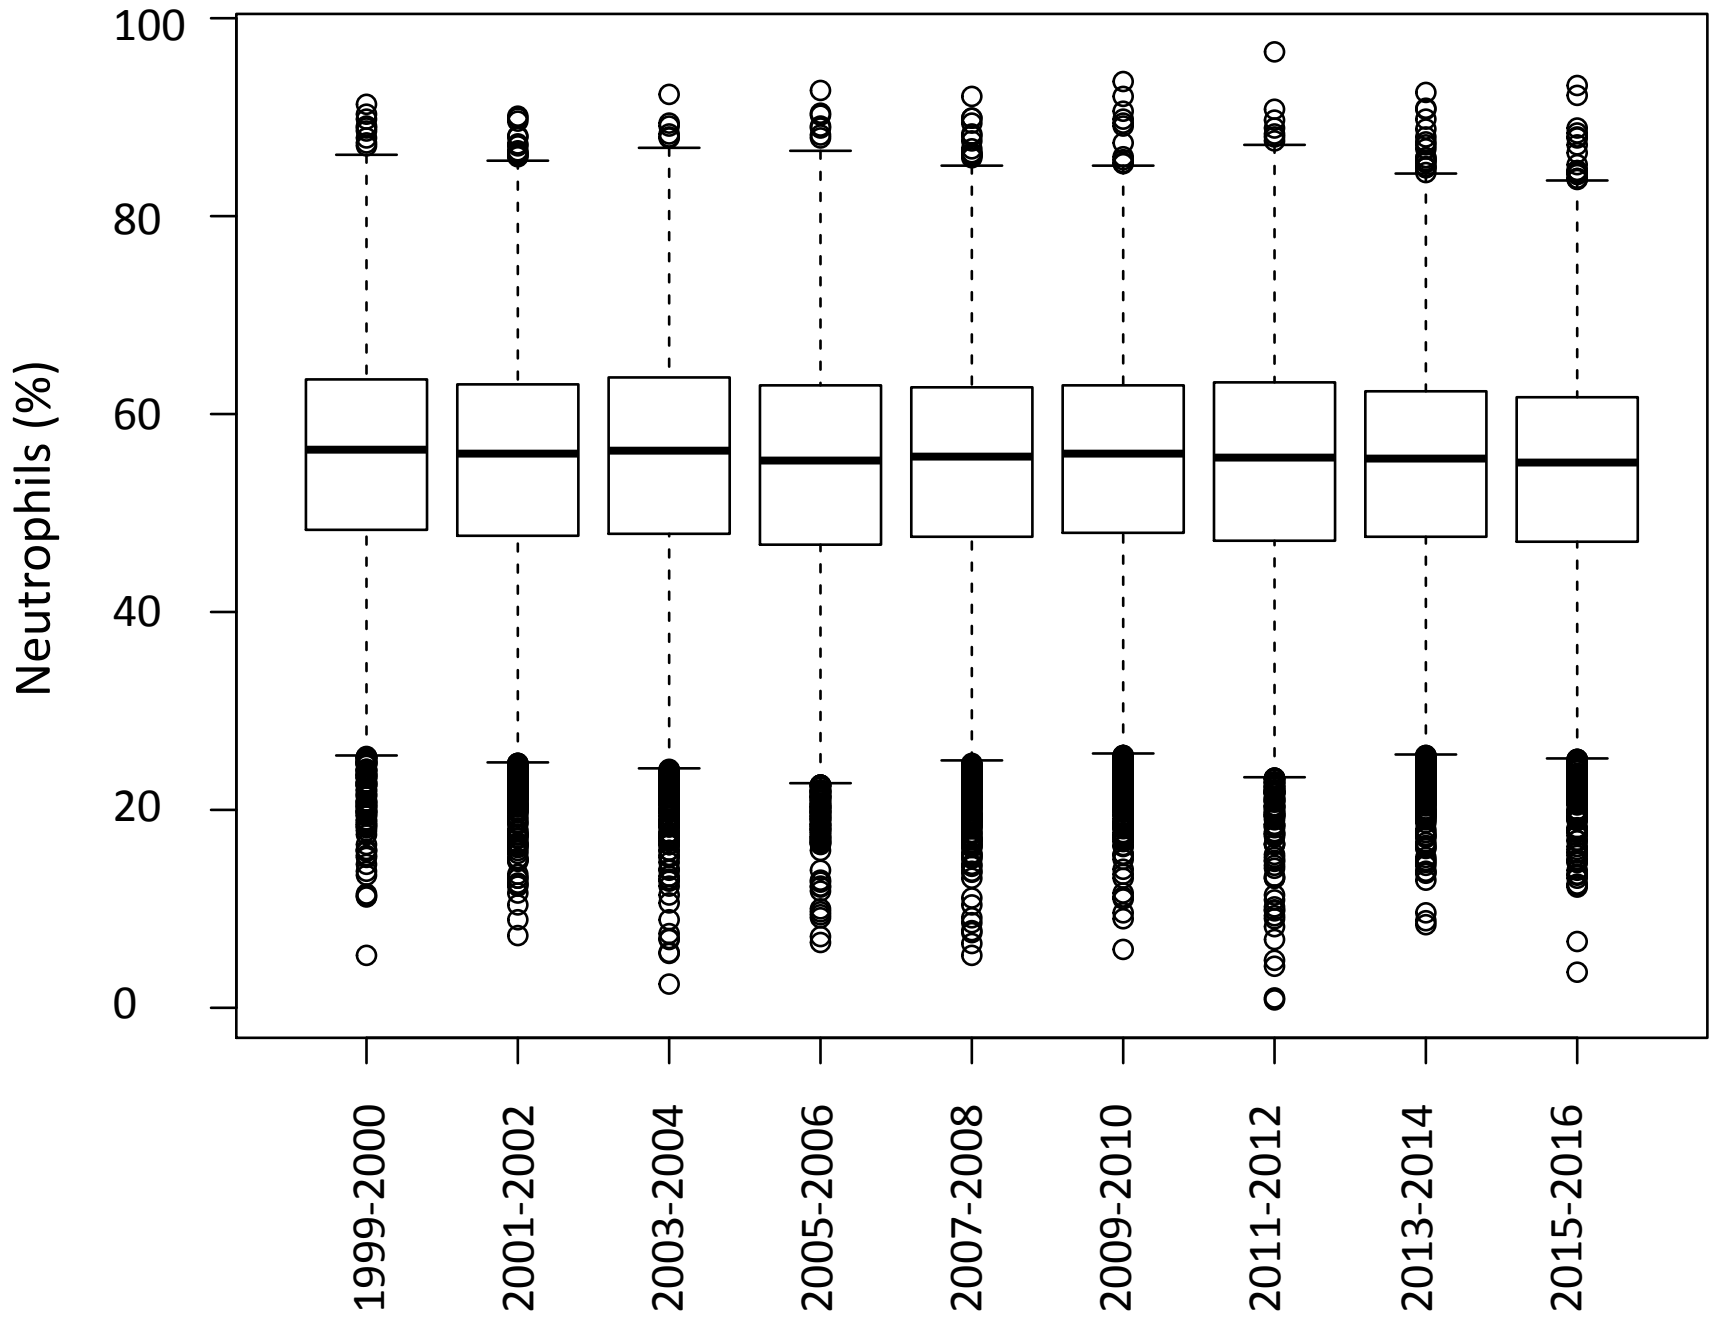

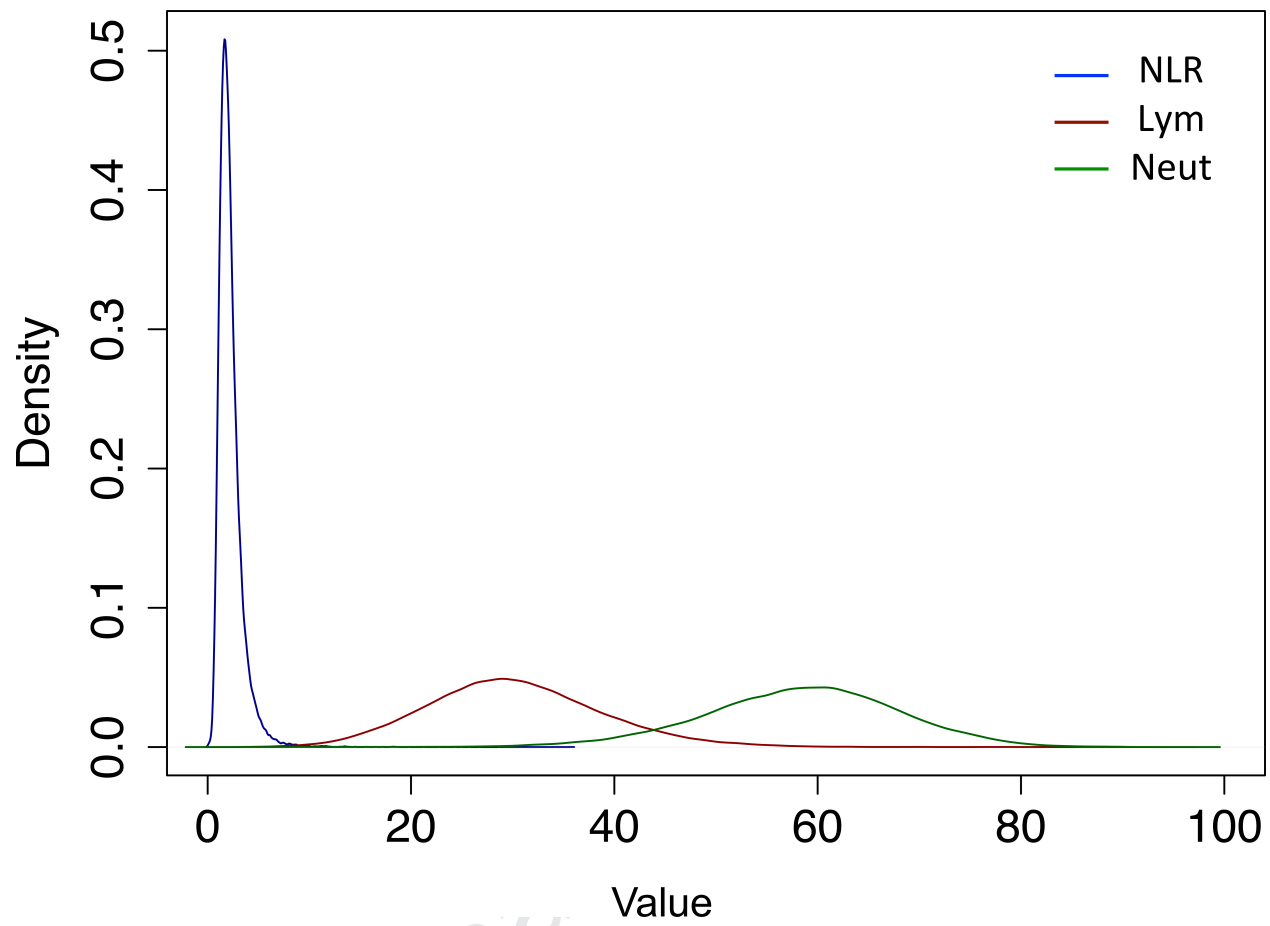

Journe
